# Supplementary material for: An autism-associated serotonin transporter variant disrupts multisensory processing
Source: PubMed Central journal article supplement (PMC5416665; doi:10.1038/tp.2017.17), 2017-03-21

### A. Multisensory Performance Across Durations

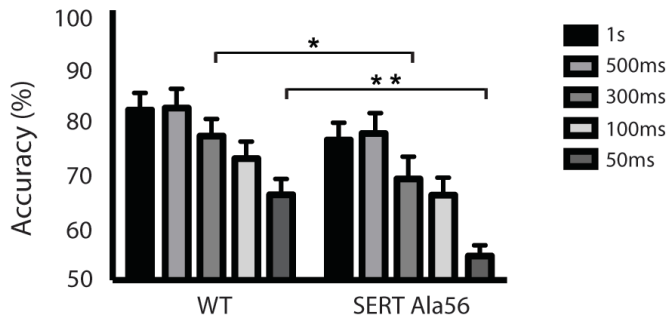

### B. Visual Performance Across Durations

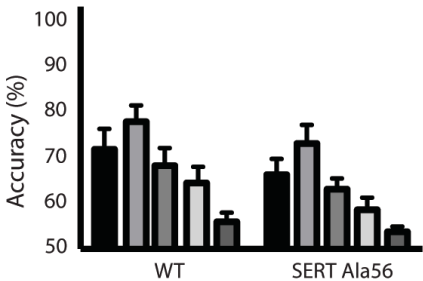

### C. Auditory Performance Across Durations

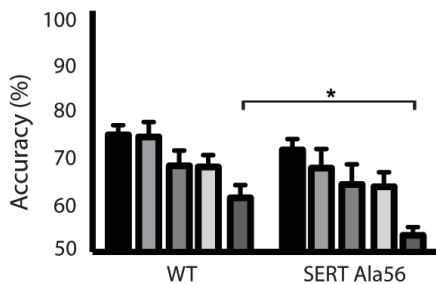

Supplement: tp201717x2.pdf [file tp201717x2.pdf]
