# Supplementary material for: An autism-associated serotonin transporter variant disrupts multisensory processing
Source: PubMed Central journal article supplement (PMC5416665; doi:10.1038/tp.2017.17), 2017-03-21

Number of Errors

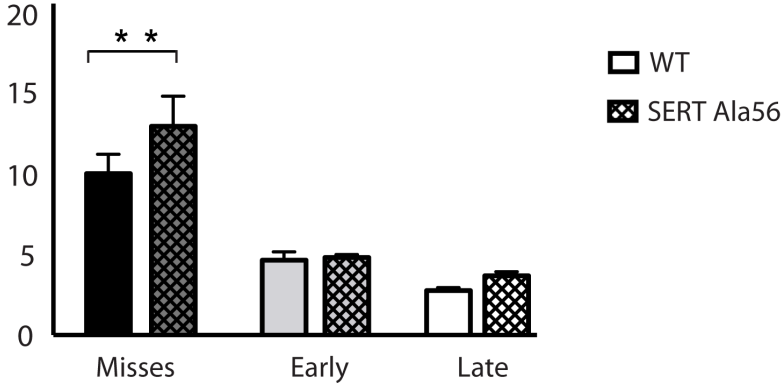

Supplement: tp201717x4.pdf [file tp201717x4.pdf]
